# Supplementary material for: Modulation of Autonomic Function and Heart Rate Variability by Transcutaneous Spinal Cord Stimulation and Physical Therapy in Individuals with Chronic Spinal Cord Injury
Source: Research Square preprint supplement (doi:10.21203/rs.3.rs-8398767/v1), 2026-01-12
Supplement: Supplementary file 1 [file ad706f528a6330bd968ac25f.docx]

Appendix A

**Physical Therapy**

*Exercises for paraplegic subjects*

Seated balance and weight shifting: Start with trunk and upper-extremity support, and progress to no support. Practice shifting weight side to side, forward, backward, and diagonally.

Multidirectional reaching: From a seated position, reach in different directions, heights, and distances, including cross-midline movements and trunk rotations.

Trunk control exercises:

Inclinations (forward and sideways)

Trunk rotations

Controlled movements coordinated with breathing

Upper-limb strengthening (using weights, bands, or body weight):

Biceps curls, triceps extensions, deltoid raises (front/lateral)

Shoulder press, chest press, band pull-aparts

Closed-chain exercises: partial push-ups or presses using body weight

Functional mobility and coordination:

Transfer training

Overhead reach with a ball or object.

Throwing and catching a medicine ball (progressing with weight and distance)

Hand-eye coordination tasks

*Exercises for tetraplegic subjects*

Shoulder flexion and abduction with resistance bands.

Biceps curls with light weights or resistance bands, for elbow flexor activation.

Triceps extensions using resistance bands.

Scapular retraction (“rows”).

Shoulder shrugs or scapular elevation.

Seated weight shifts (anterior/posterior and lateral).

Reaching tasks beyond base of support.

Medicine ball or weighted ball passes.

Appendix B

Individual AIS and ANS measurements

Table B1. Individual baseline AIS scores.

| Participant ID | Sensitive | | Motor | |
| --- | --- | --- | --- | --- |
|  | LT total | PP total | UEMS Total | LEMS total |
| P004 | 82 | 87 | 50 | 3 |
| P007 | 42 | 43 | 50 | 0 |
| P008 | 50 | 50 | 50 | 0 |
| P009 | 76 | 76 | 50 | 0 |
| P010 | 46 | 49 | 50 | 0 |
| P011 | 66 | 69 | 50 | 0 |
| P012 | 30 | 47 | 25 | 14 |
| P013 | 41 | 37 | 28 | 0 |

LT, light touch; PP, pinprick; UEMS, Upper extremities motor scores; LEMS, Lower extremities motor scores.

**Table B2.** ASAF individual scores at baseline.

|  | **Participant ID** | | | | | | |  |
| --- | --- | --- | --- | --- | --- | --- | --- | --- |
| **System /Organ** | **P004** | **P007** | **P008** | **P009** | **P010** | **P011** | **P012** | **P013** |
| Heart Rate | 2 | 1 | 2 | 2 | 2 | 2 | 2 | 2 |
| Systolic | 2 | 2 | 2 | 2 | 2 | 2 | 2 | 2 |
| Diastolic | 2 | 2 | 2 | 1 | 2 | 2 | 2 | 2 |
| Thermoregulation | 2 | 2 | 2 | 2 | 2 | 2 | 2 | 2 |
| Sudomotor | 1 | 1 | 1 | 0 | 1 | 1 | 2 | 1 |
| Broncho-pulmonary | 2 | 2 | 2 | 2 | 2 | 2 | 2 | 2 |
| **Total Score General Autonomic Section** | **11** | **10** | **11** | **9** | **11** | **11** | **12** | **11** |
| Awareness of bladder fullness | 2 | 0 | 0 | 0 | 0 | 0 | 1 | 0 |
| Ability to prevent bladder leakage | 2 | 0 | 0 | 0 | 0 | 0 | 0 | 0 |
| Awareness of bowel fullness | 0 | 2 | 0 | 0 | 0 | 0 | 1 | 0 |
| Ability to prevent bowel leakage | 0 | 1 | 0 | 1 | 2 | 0 | 0 | 0 |
| Psychogenic arousal | 0 | 0 | 1 | 1 | 1 | 0 | 0 | 0 |
| Reflex genital arousal | 0 | 2 | 1 | 2 | 1 | 0 | 0 | 0 |
| Orgasm | 0 | 0 | 0 | 0 | 0 | 0 | 0 | 0 |
| Ejaculation | 0 | 2 | 1 | 0 | 0 | 0 | 0 | 0 |
| **Total Score Sacral Autonomic Section** | **4** | **7** | **3** | **4** | **4** | **0** | **2** | **0** |

**Table B3.** ASAF individual scores at 12 weeks.

|  | **Participant ID** | | | | | | |  |
| --- | --- | --- | --- | --- | --- | --- | --- | --- |
| **System /Organ** | **P004** | **P007** | **P008** | **P009** | **P010** | **P011** | **P012** | **P013** |
| Heart Rate | 2 | 2 | 2 | 2 | 2 | 2 | 2 | 2 |
| Systolic | 2 | 2 | 2 | 2 | 2 | 2 | 2 | 2 |
| Diastolic | 2 | 2 | 2 | 2 | 2 | 2 | 2 | 2 |
| Thermoregulation | 2 | 2 | 2 | 2 | 2 | 2 | 2 | 2 |
| Sudomotor | 1 | 0 | 1 | 0 | 1 | 1 | 1 | 1 |
| Broncho-pulmonary | 2 | 2 | 2 | 2 | 2 | 2 | 2 | 2 |
| **Total Score General Autonomic Section** | **11** | **10** | **11** | **10** | **11** | **11** | **11** | **11** |
| Awareness of bladder fullness | 2 | 0 | 0 | 1 | 0 | 0 | 0 | 1 |
| Ability to prevent bladder leakage | 2 | 0 | 0 | 1 | 0 | 0 | 0 | 0 |
| Awareness of bowel fullness | 0 | 2 | 0 | 0 | 0 | 0 | 1 | 0 |
| Ability to prevent bowel leakage | 0 | 1 | 0 | 2 | 2 | 0 | 0 | 0 |
| Pychogenic arousal | 0 | 0 | 1 | 0 | 1 | 0 | 1 | 0 |
| Reflex genital arousal | 0 | 2 | 1 | 2 | 1 | 0 | 1 | 0 |
| Orgasm | 0 | 0 | 0 | 0 | 0 | 0 | 0 | 0 |
| Ejaculation | 0 | 2 | 1 | 0 | 0 | 0 | 0 | 0 |
| **Total Score Sacral Autonomic Section** | **4** | **7** | **3** | **6** | **4** | **0** | **3** | **1** |

**Table B4.** ASAF individual scores at 16 weeks.

|  | **Participant ID** | | | | | | |  |
| --- | --- | --- | --- | --- | --- | --- | --- | --- |
| **System /Organ** | **P004** | **P007** | **P008** | **P009** | **P010** | **P011** | **P012** | **P013** |
| Heart Rate | 2 | 2 | 2 | 2 | 2 | 2 | 2 | 2 |
| Systolic | 2 | 2 | 2 | 2 | 2 | 2 | 2 | 2 |
| Diastolic | 2 | 2 | 2 | 2 | 2 | 2 | 2 | 2 |
| Thermoregulation | 2 | 2 | 2 | 2 | 2 | 2 | 2 | 2 |
| Sudomotor | 1 | 0 | 1 | 0 | 1 | 1 | 1 | 1 |
| Broncho-pulmonary | 2 | 2 | 2 | 2 | 2 | 2 | 2 | 2 |
| **Total Score General Autonomic Section** | **11** | **10** | **11** | **10** | **11** | **12** | **11** | **11** |
| Awareness bladder fullness | 2 | 0 | 0 | 1 | 0 | 0 | 0 | 1 |
| Ability to prevent bladder leakage | 2 | 0 | 0 | 1 | 0 | 0 | 0 | 0 |
| Awareness of bowell fullnes | 0 | 2 | 0 | 0 | 0 | 0 | 1 | 0 |
| Ability to prevent bowel leakage | 0 | 1 | 0 | 2 | 2 | 0 | 0 | 0 |
| Pychogenic arousal | 0 | 0 | 1 | 0 | 1 | 0 | 1 | 0 |
| Reflex genital arousal | 0 | 2 | 1 | 2 | 1 | 0 | 1 | 0 |
| Orgasm | 0 | 0 | 0 | 0 | 0 | 0 | 0 | 0 |
| Ejaculation | 0 | 2 | 1 | 0 | 0 | 0 | 0 | 0 |
| **Total Score Sacral Autonomic Section** | **4** | **7** | **3** | **6** | **4** | **0** | **2** | **1** |

**Table B5.** NBSS individual scores at baseline, 12 and 16 weeks.

| **Participant ID** | **Baseline** | | |  | **12 weeks** | | |  | **16 weeks** | |  | |
| --- | --- | --- | --- | --- | --- | --- | --- | --- | --- | --- | --- | --- |
|  | **I** | **S and V** | **C** | **Total** | **I** | **S and V** | **C** | **Total** | **I** | **S and V** | **C** | **Total** |
| **P004** | 8 | 8 | 0 | 16 | 1 | 5 | 0 | 6 | 12 | 11 | 1 | 24 |
| **P007** | 17 | 8 | 6 | 31 | 15 | 10 | 7 | 32 | 10 | 9 | 4 | 23 |
| **P008** | 4 | 3 | 6 | 13 | 7 | 2 | 11 | 20 | 6 | 4 | 5 | 15 |
| **P009** | 14 | 10 | 5 | 29 | 16 | 4 | 6 | 26 | 16 | 4 | 6 | 26 |
| **P010** | 19 | 10 | 6 | 35 | 16 | 8 | 5 | 29 | 17 | 7 | 4 | 28 |
| **P011** | 1 | 2 | 0 | 3 | 0 | 7 | 0 | 7 | 0 | 7 | 0 | 7 |
| **P012** | 0 | 3 | 3 | 6 | 6 | 3 | 7 | 16 | 6 | 3 | 7 | 16 |
| **P013** | 8 | 2 | 0 | 10 | 7 | 4 | 0 | 11 | 7 | 4 | 0 | 11 |

I, Incontinence; S and V, Storage and voiding; C, consequences.
